# Supplementary material for: Opportunistic Visitors: Long-Term Behavioural Response of Bull Sharks to Food Provisioning in Fiji
Source: PLOS journal article supplement (doi:10.1371/journal.pone.0058522), 2013-03-13

Transmitter ID

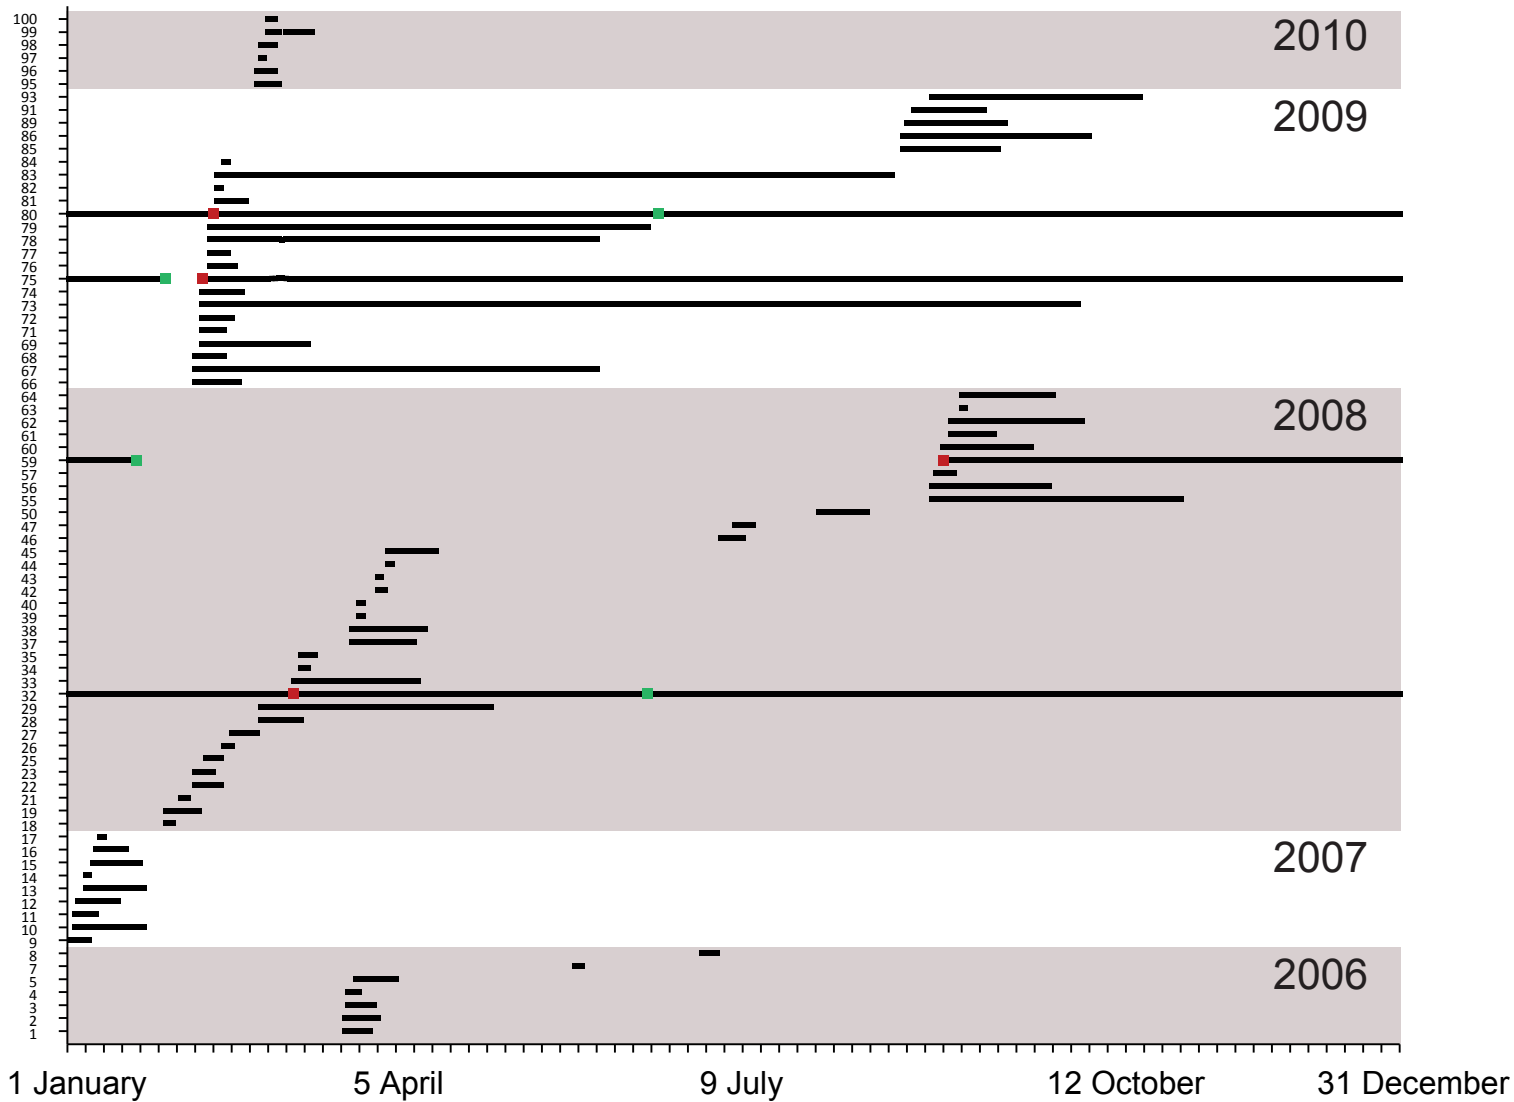

Supplement: S2 (10.1371/journal.pone.0058522.s002) [file journal.pone.0058522.s002]
